# Supplementary material
Source: MDPI journal article supplement (https://www.mdpi.com/2079-9276/13/1/6)
Supplement: s1 [file s1]

**Table S1.** Factor loading eigenvalue, natural saltlicks (NS), artificial saltlicks (AS), general soil (GS), minerals and coordinates of sites of correlative coherence analysis (CCA) in Salakphra Wildlife Sanctuary (SWS), and Kui Buri National Park (KNP).

| Protected area | Factor     | Abbreviation | PC1    | PC2    | PC3    |
|----------------|------------|--------------|--------|--------|--------|
|                | eigenvalue |              | 0.027  | 0.003  | 0.023  |
| SWS            | GS         | GSSWS        | 1.674  | 2.822  | -1.999 |
|                | AS         | ASSWS        | 0.468  | -1.089 | -0.687 |
|                | NS         | NSWS         | 0.464  | -1.127 | -0.448 |
| KNP            | GS         | GSKNP        | 1.313  | -0.502 | -0.714 |
|                | AS         | ASKNP        | -1.436 | 0.804  | 0.666  |
|                | NS         | NSKNP        | -1.761 | 0.718  | 2.112  |
|                | pH         | pH           | -0.150 | -1.047 | 0.000  |
|                | Salinity   | Salinity     | -1.039 | -0.201 | 0.000  |
|                | Phosphorus | P            | 0.109  | 0.110  | -0.27  |
|                | Potassium  | K            | 0.239  | 0.191  | -0.149 |
|                | Calcium    | Ca           | -0.554 | 0.089  | 0.460  |
|                | Magnesium  | Mg           | -0.075 | -0.028 | 0.121  |
|                | Sodium     | Na           | -0.269 | -0.019 | -0.092 |
|                | Manganese  | Mn           | 0.198  | -0.056 | -0.443 |
|                | Zinc       | Zn           | 0.036  | -0.005 | -0.233 |
|                | Ferrous    | Fe           | 0.067  | -0.013 | -0.027 |
|                | Copper     | Cu           | 0.149  | -0.063 | -0.293 |
|                | Selenium   | Se           | -0.024 | 0.229  | -0.189 |
